# Supplementary material for: Visible-light-driven anaerobic oxidative upgrading of biomass-derived HMF for co-production of DFF and H2 over a 1D Cd0.7Zn0.3S/NiSe2 Schottky junction
Source: Royal Society of Chemistry journal article supplement (doi:10.1039/d3gc00026e), 2023-01-01
Supplement: d3gc00026e1.pdf [file d3gc00026e1.pdf]

**Electronic Supplementary Information for**

**Visible-light-driven anaerobic oxidative upgrading of  
biomass-derived HMF for co-production of DFF and  
H<sub>2</sub> over 1D Cd<sub>0.7</sub>Zn<sub>0.3</sub>S/NiSe<sub>2</sub> Schottky junction**

Tao Shan, Luteng Luo, Taoran Chen, Lixun Deng, Mengqing Li, Xuhui Yang, Lijuan  
Shen, Min-Quan Yang\*

College of Environmental and Resource Sciences, College of Carbon Neutral Modern  
Industry, Fujian Key Laboratory of Pollution Control & Resource Reuse, Fujian  
Normal University, Fuzhou 350007, P.R. China

\*Corresponding Author E-mail: [yangmq@fjnu.edu.cn](mailto:yangmq@fjnu.edu.cn)

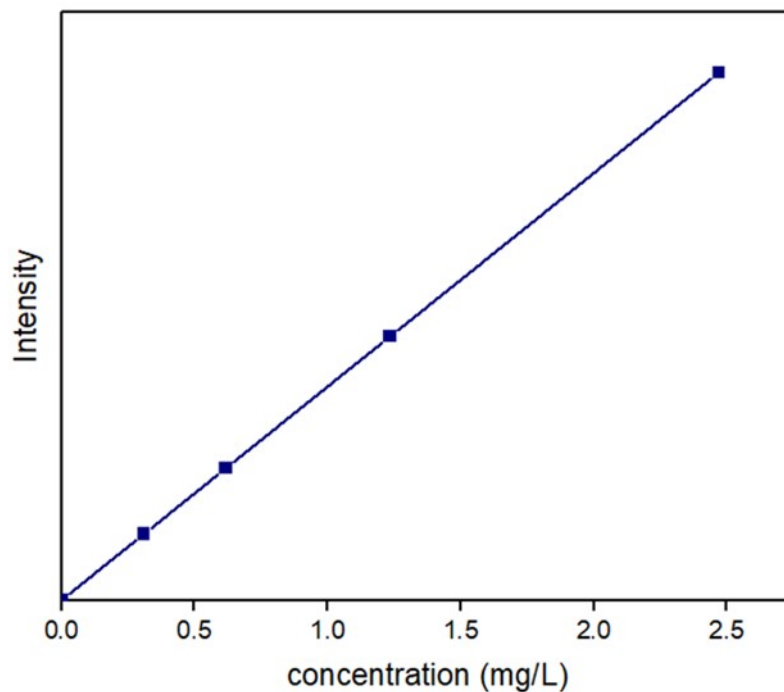

**Figure S1.** Standard curve of the ICP-OES for Ni<sup>2+</sup>.

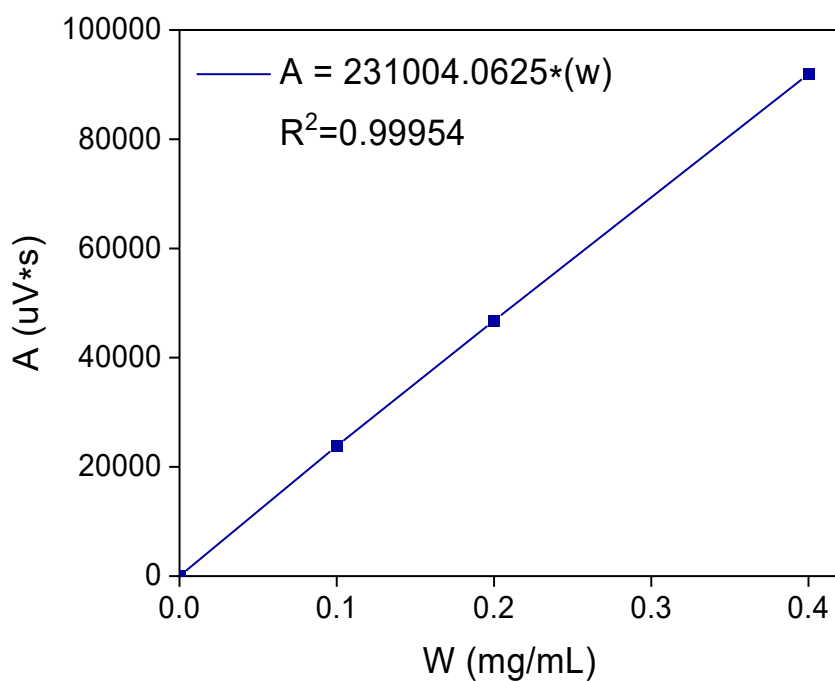

**Figure S2.** Standard curve of the GC 9790plus for H<sub>2</sub>.

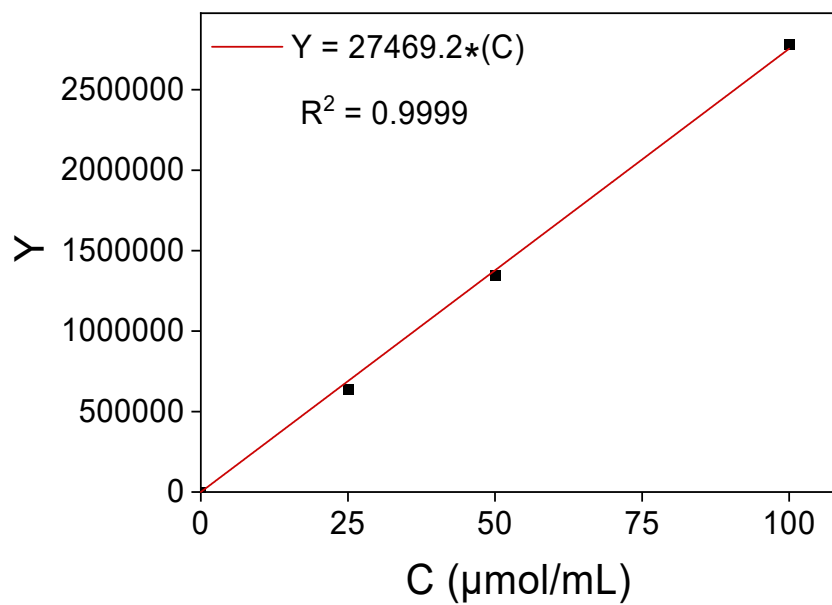

**Figure S3.** Standard curve of the GC-2030 for DFF.

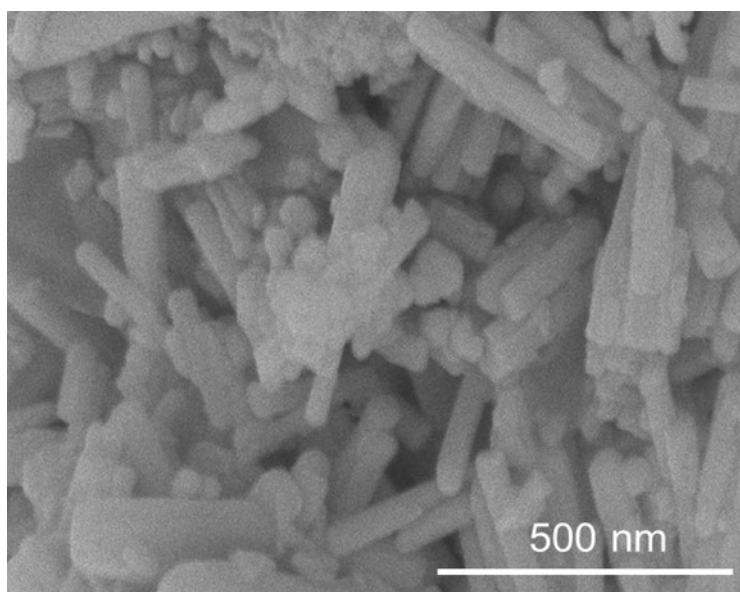

**Figure S4.** SEM image of CdS.

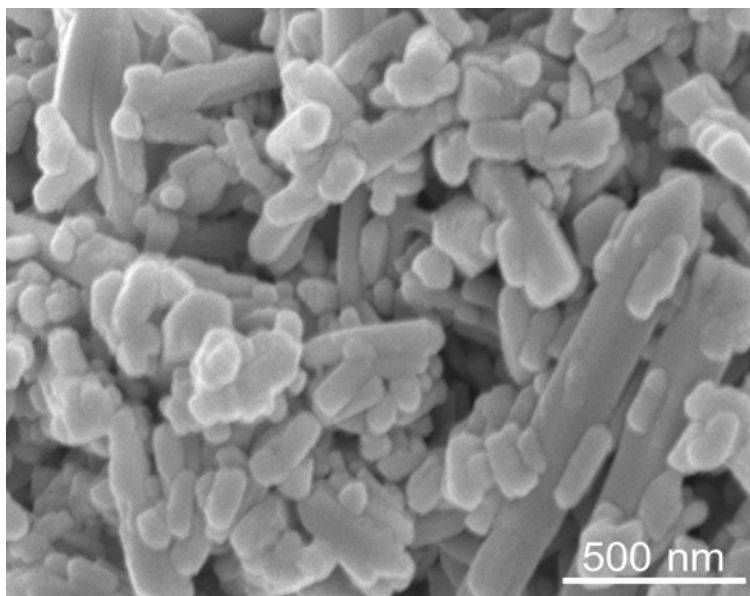

**Figure S5.** SEM image of CdS/NiSe<sub>2</sub> 4%.

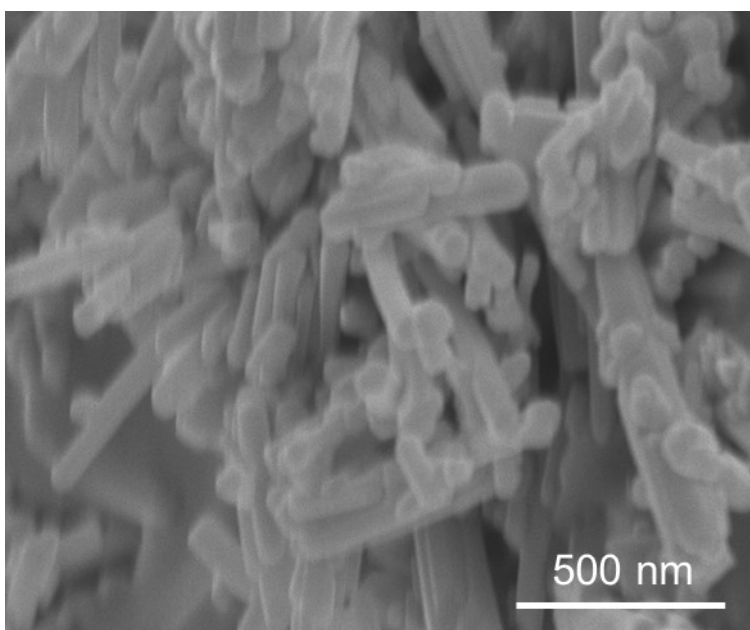

**Figure S6.** SEM image of Cd<sub>0.9</sub>Zn<sub>0.1</sub>S.

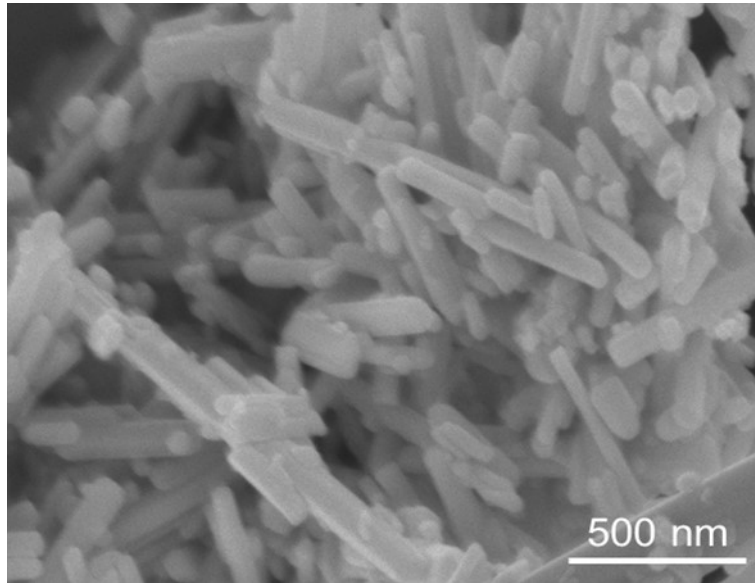

**Figure S7.** SEM image of  $\text{Cd}_{0.9}\text{Zn}_{0.1}\text{S}/\text{NiSe}_2$  4%.

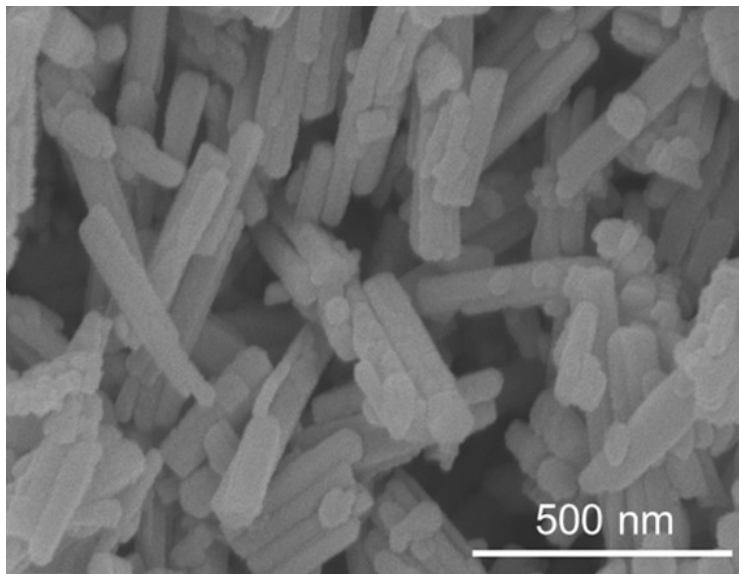

**Figure S8.** SEM image of  $\text{Cd}_{0.8}\text{Zn}_{0.2}\text{S}$ .

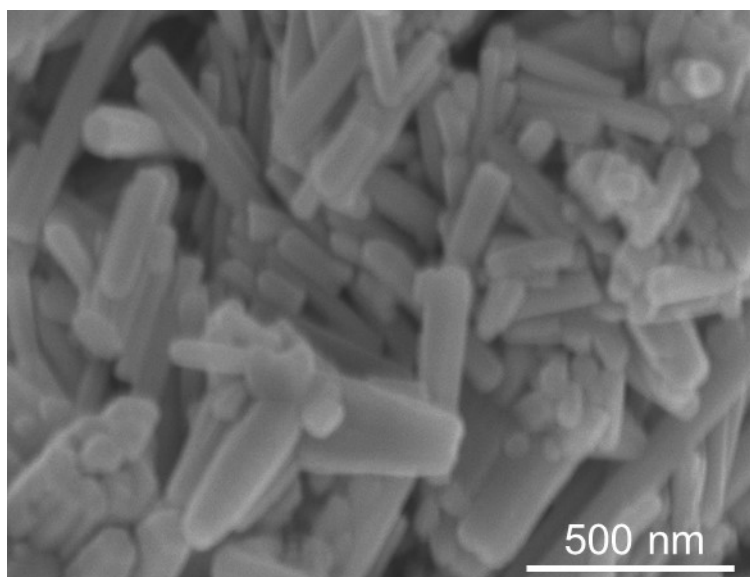

**Figure S9.** SEM image of  $\text{Cd}_{0.8}\text{Zn}_{0.2}\text{S}/\text{NiSe}_2$  4%.

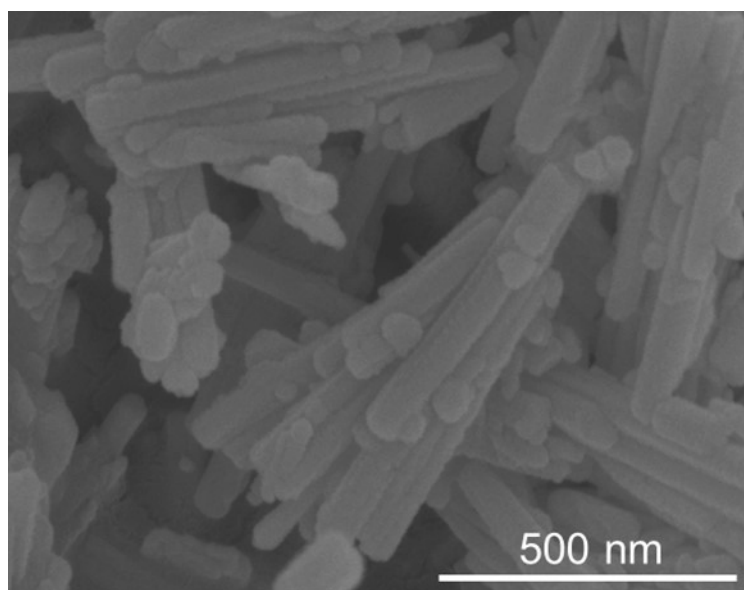

**Figure S10.** SEM image of  $\text{Cd}_{0.6}\text{Zn}_{0.4}\text{S}$ .

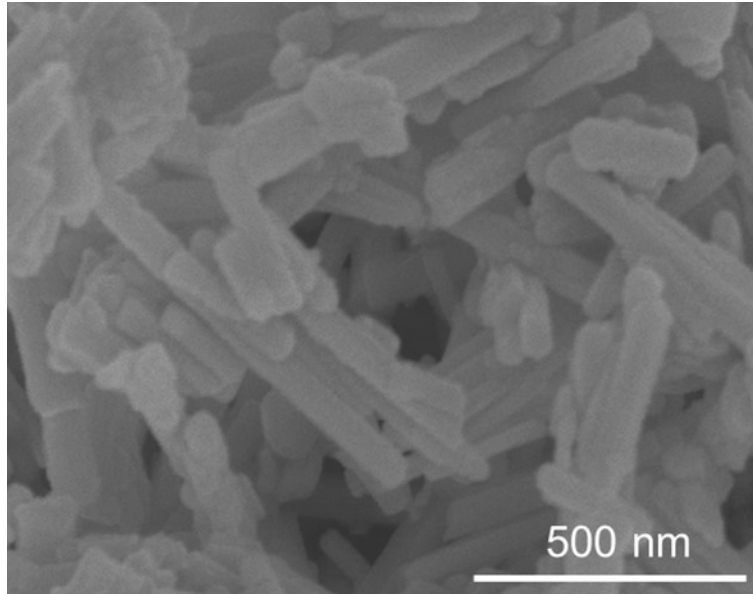

**Figure S11.** SEM image of  $\text{Cd}_{0.6}\text{Zn}_{0.4}\text{S}/\text{NiSe}_2$  4%.

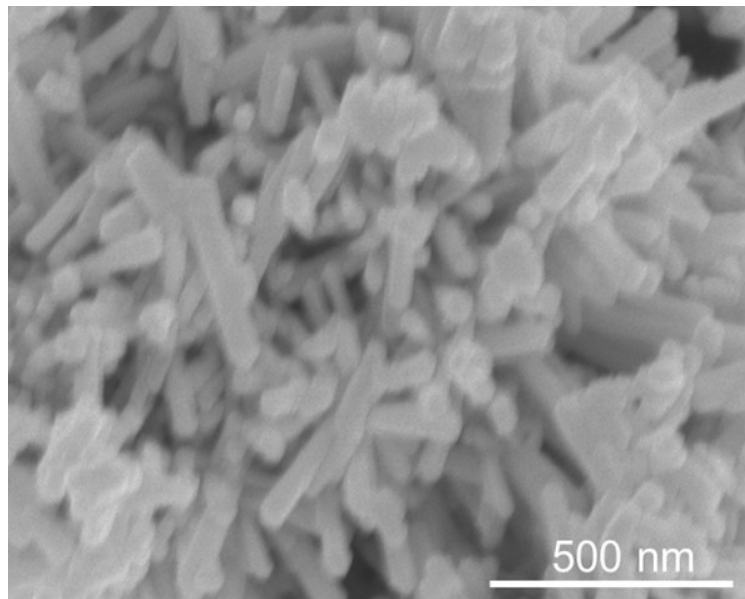

**Figure S12.** SEM image of  $\text{Cd}_{0.5}\text{Zn}_{0.5}\text{S}$ .

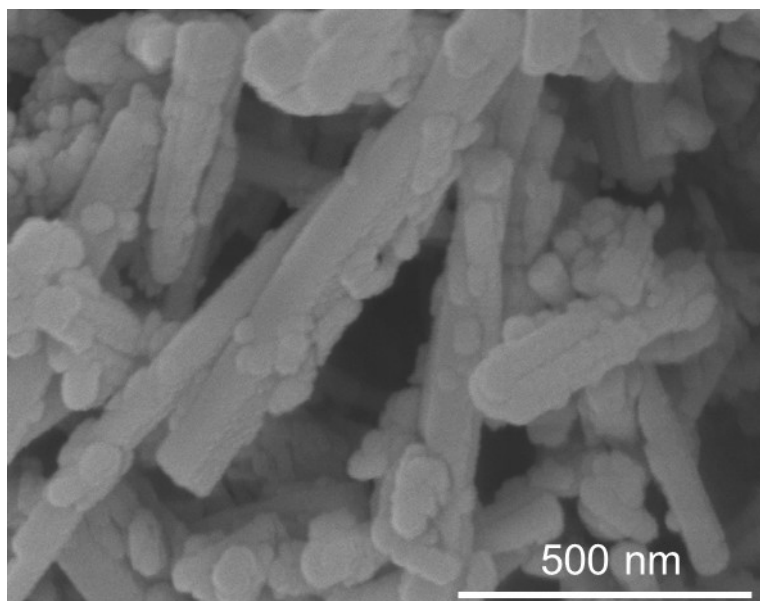

**Figure S13.** SEM image of  $\text{Cd}_{0.5}\text{Zn}_{0.5}\text{S}/\text{NiSe}_2$  4%.

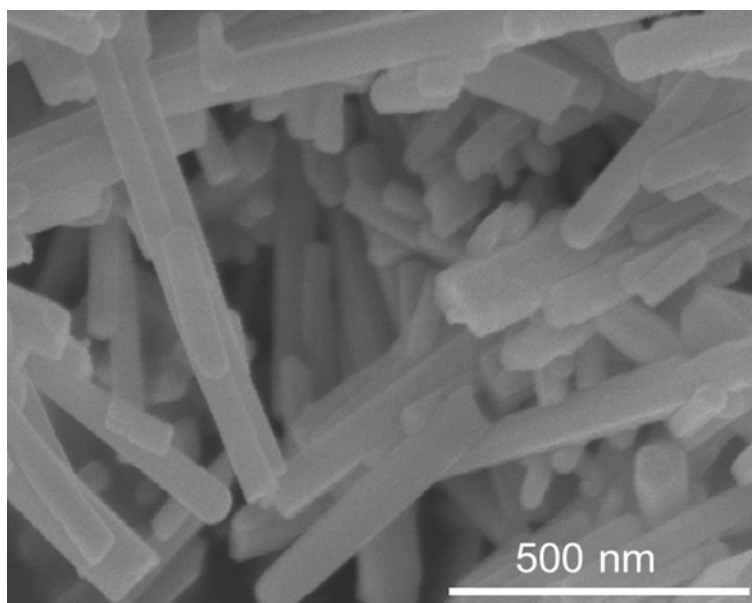

**Figure S14.** SEM image of  $\text{Cd}_{0.7}\text{Zn}_{0.3}\text{S}/\text{NiSe}_2$  2.5%.



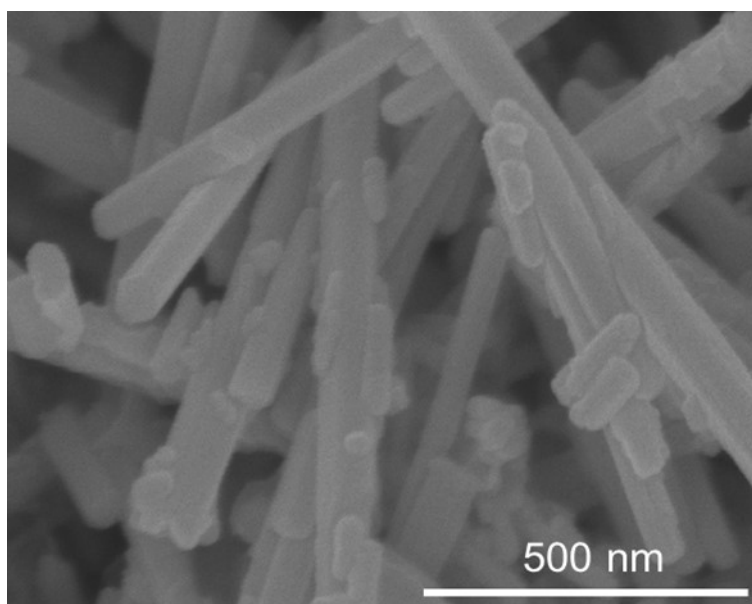

**Figure S15.** SEM image of  $\text{Cd}_{0.7}\text{Zn}_{0.3}\text{S}/\text{NiSe}_2$  3.5%.

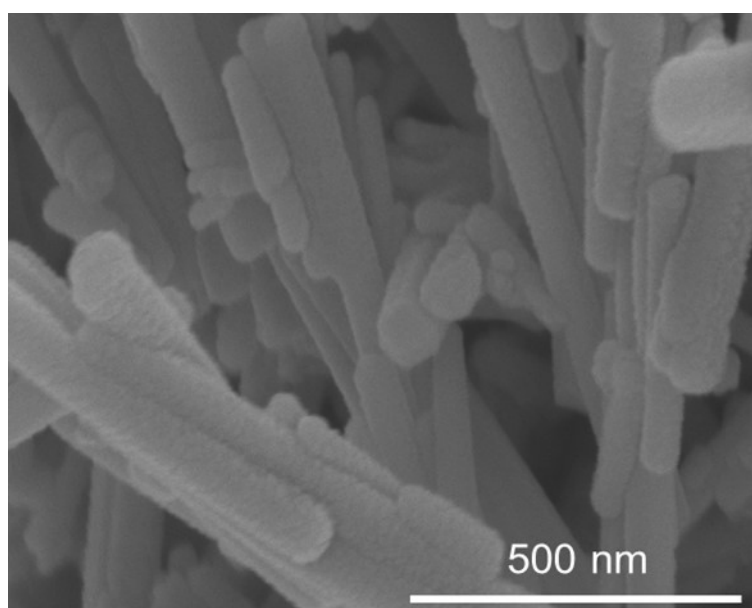

**Figure S16.** SEM image of  $\text{Cd}_{0.7}\text{Zn}_{0.3}\text{S}/\text{NiSe}_2$  4.6%.

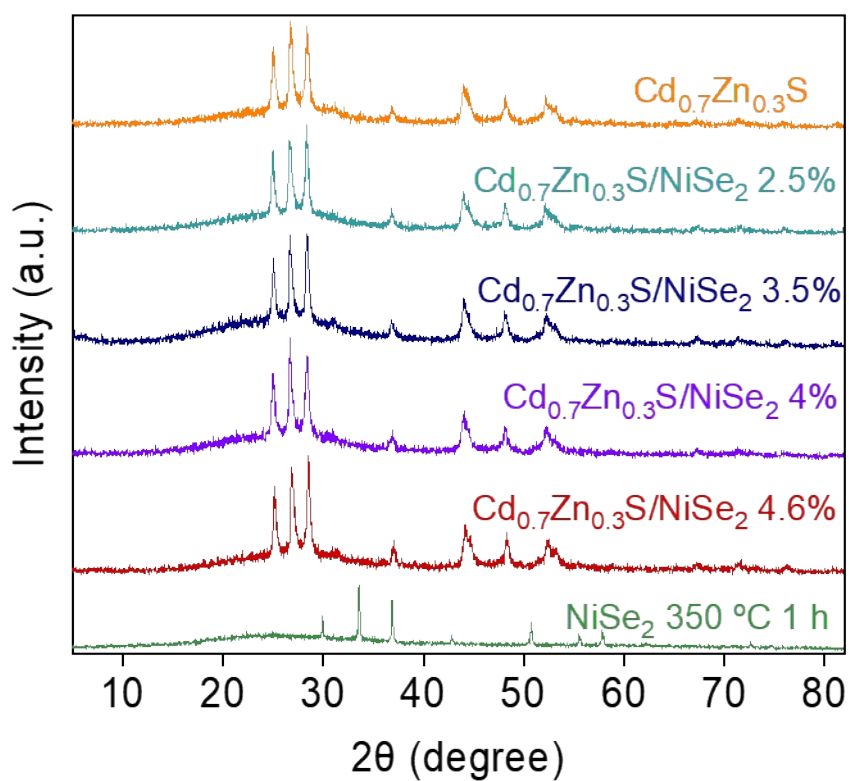

Figure S17. XRD patterns of Cd<sub>0.7</sub>Zn<sub>0.3</sub>S/NiSe<sub>2</sub> x% composites.

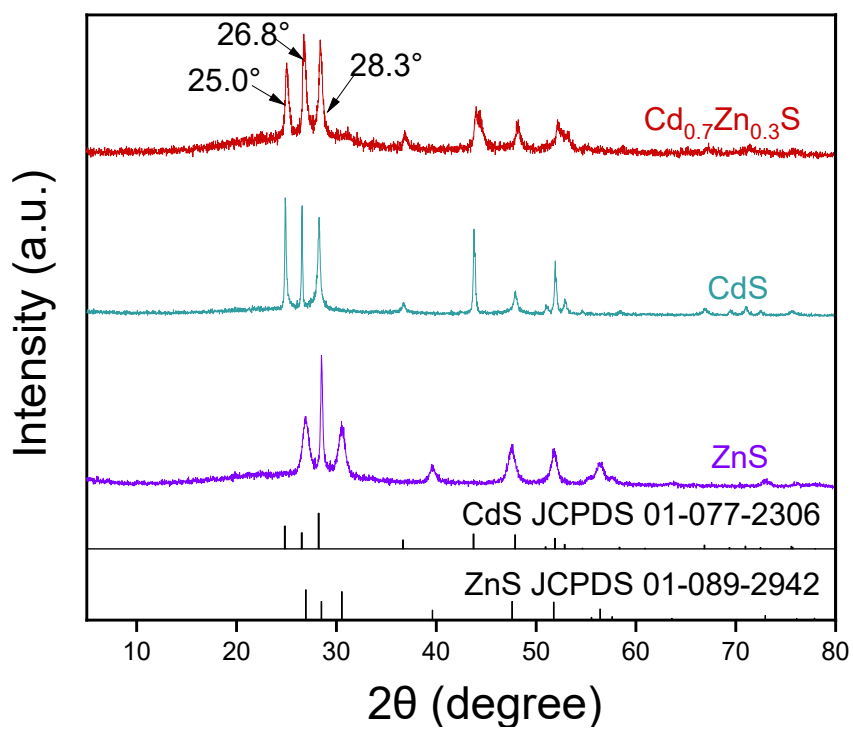

Figure S18. XRD patterns of Cd<sub>0.7</sub>Zn<sub>0.3</sub>S, CdS, and ZnS.

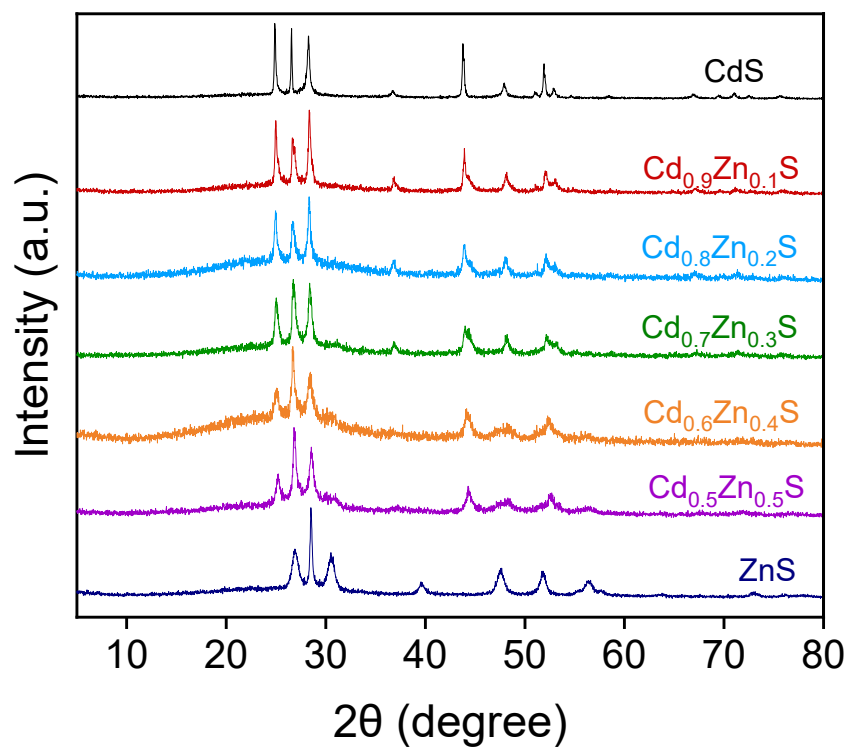

Figure S19. XRD patterns of Cd<sub>1-x</sub>Zn<sub>x</sub>S with different Cd and Zn proportions.

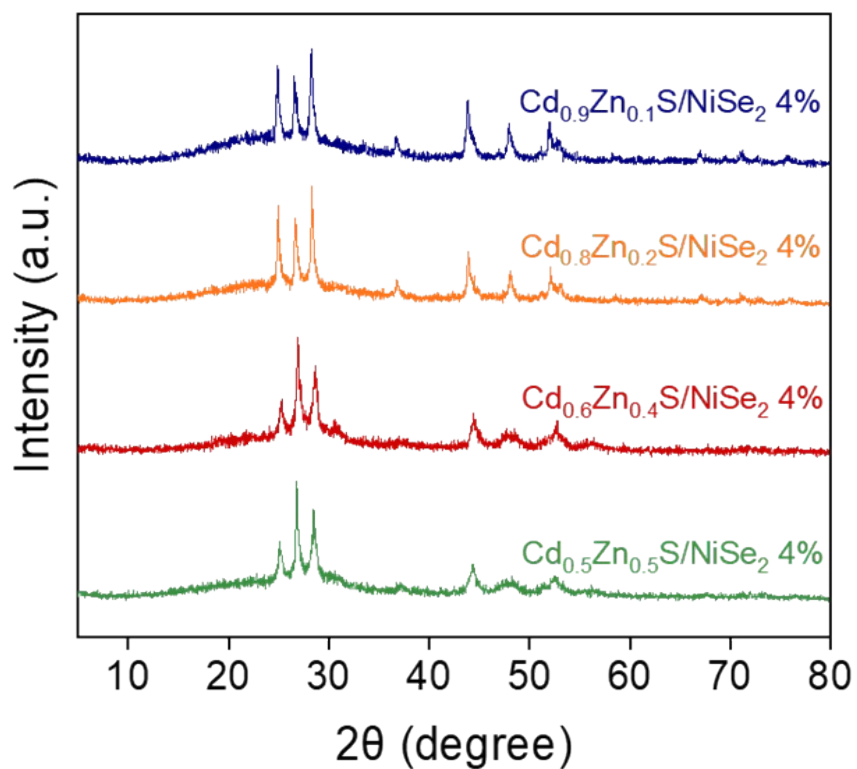

Figure S20. XRD patterns of Cd<sub>1-x</sub>Zn<sub>x</sub>S/NiSe<sub>2</sub> 4% with different Cd and Zn proportions.

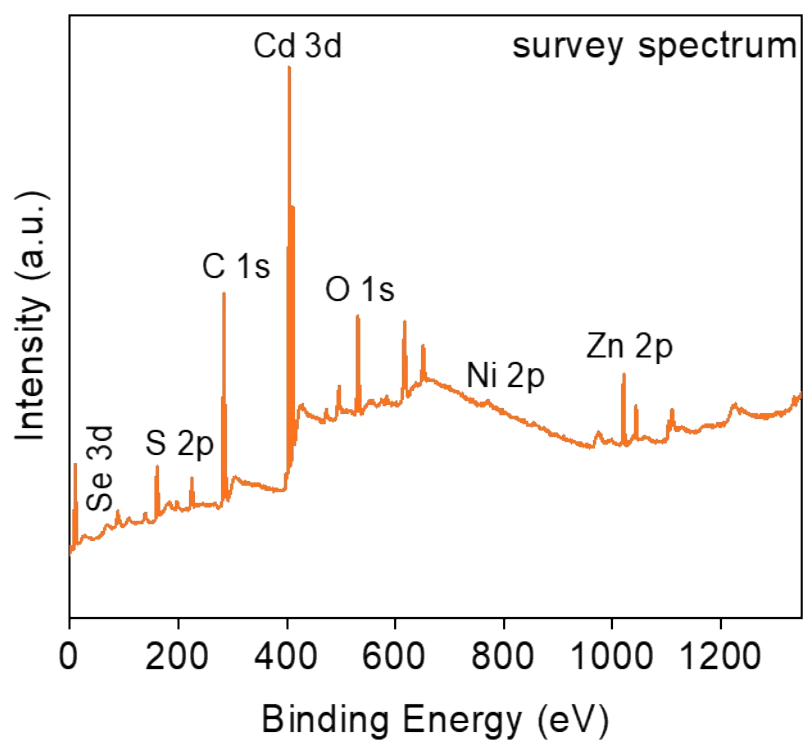

Fig. S21. XPS survey spectrum of  $\text{Cd}_{0.7}\text{Zn}_{0.3}\text{S}/\text{NiSe}_2$  4% composite.

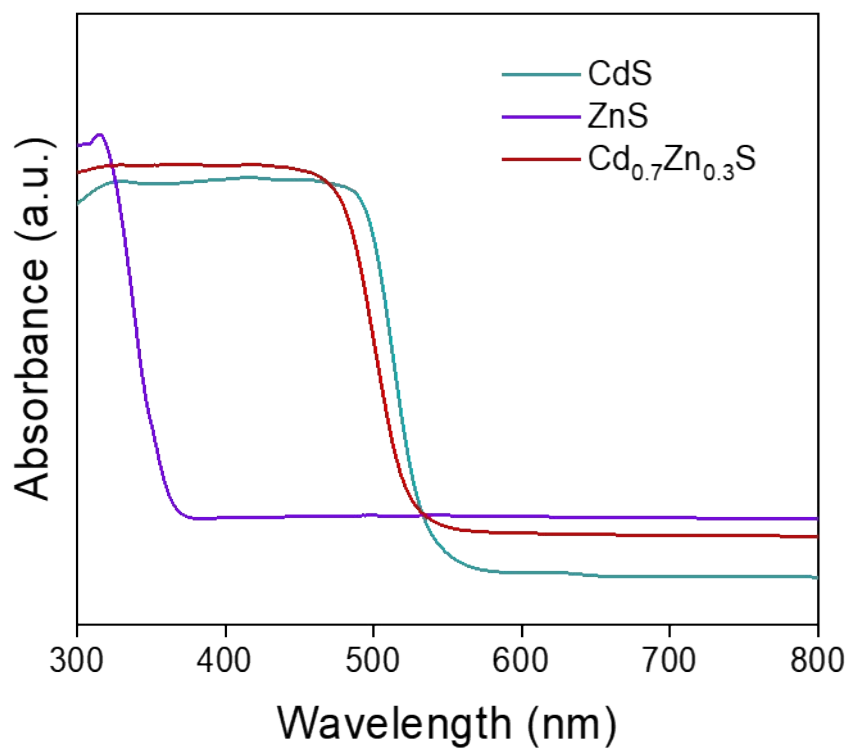

Figure S22. DRS spectra of CdS, ZnS, and  $\text{Cd}_{0.7}\text{Zn}_{0.3}\text{S}$  samples.

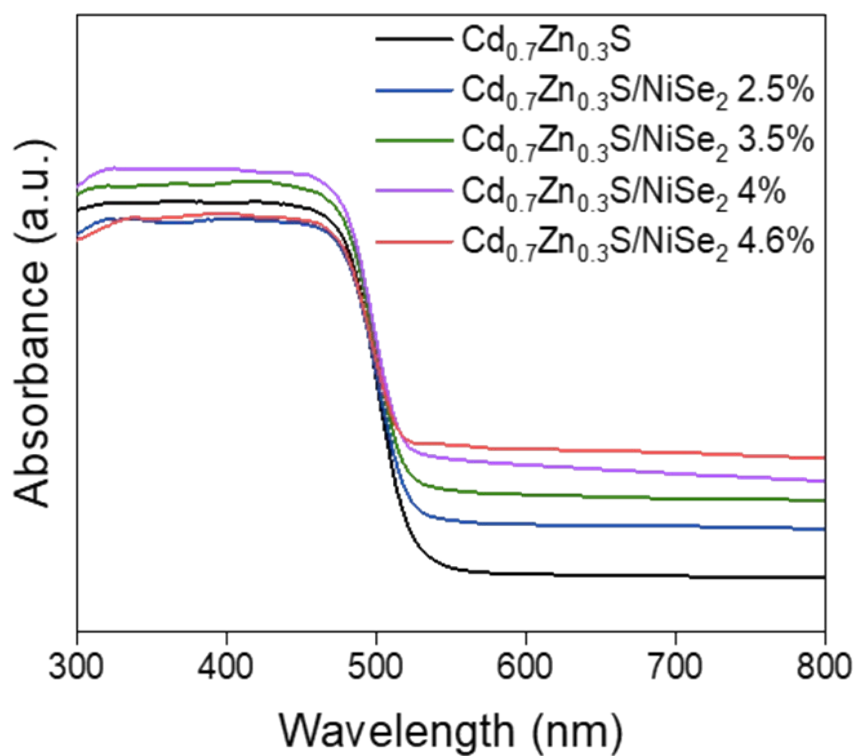

**Figure S23.** DRS spectra of  $\text{Cd}_{0.7}\text{Zn}_{0.3}\text{S}/\text{NiSe}_2$  x% samples (x = 0, 2.5, 3.5, 4, 4.6)

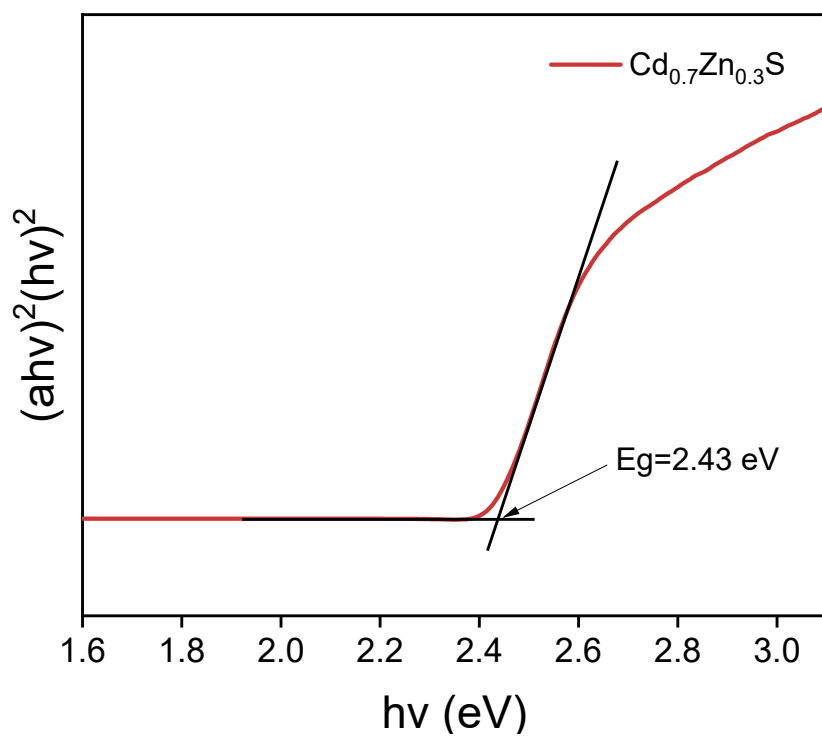

**Figure S24.** Tauc plot for measuring the bandgap of  $\text{Cd}_{0.7}\text{Zn}_{0.3}\text{S}$ .

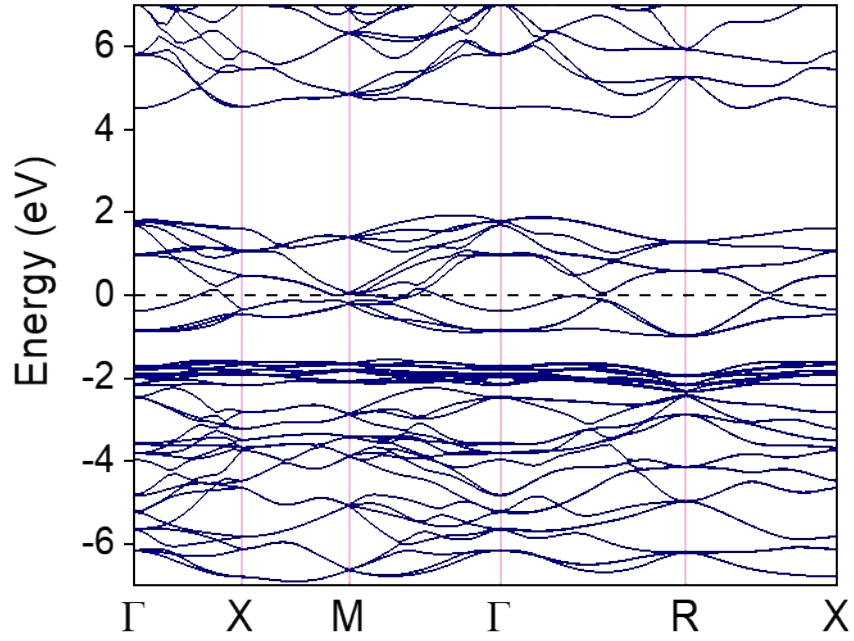

**Figure S25.** The band structure of bulk NiSe<sub>2</sub>.

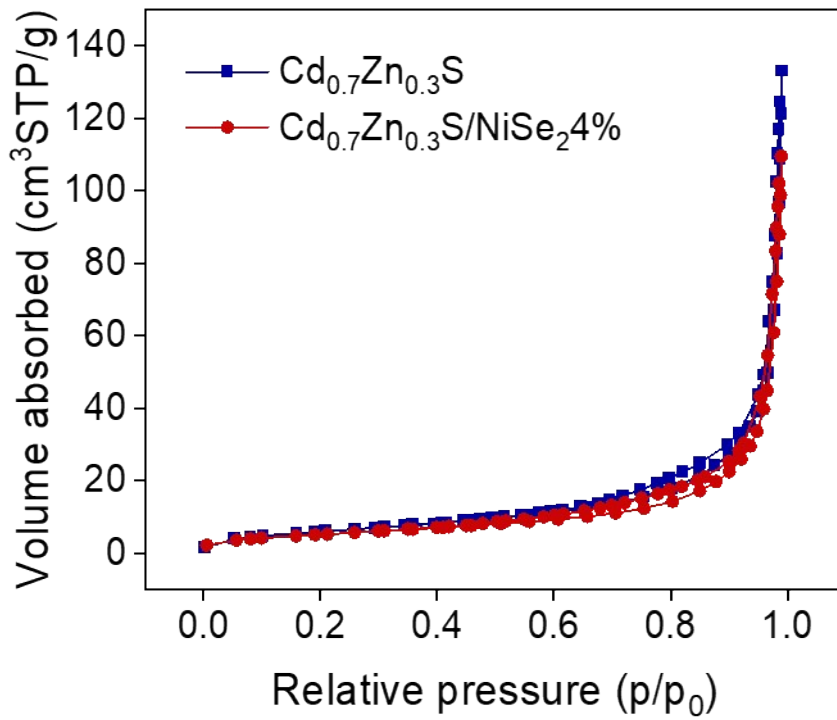

**Figure S26.** Nitrogen adsorption-desorption isotherms of Cd<sub>0.7</sub>Zn<sub>0.3</sub>S and Cd<sub>0.7</sub>Zn<sub>0.3</sub>S/NiSe<sub>2</sub> 4%.

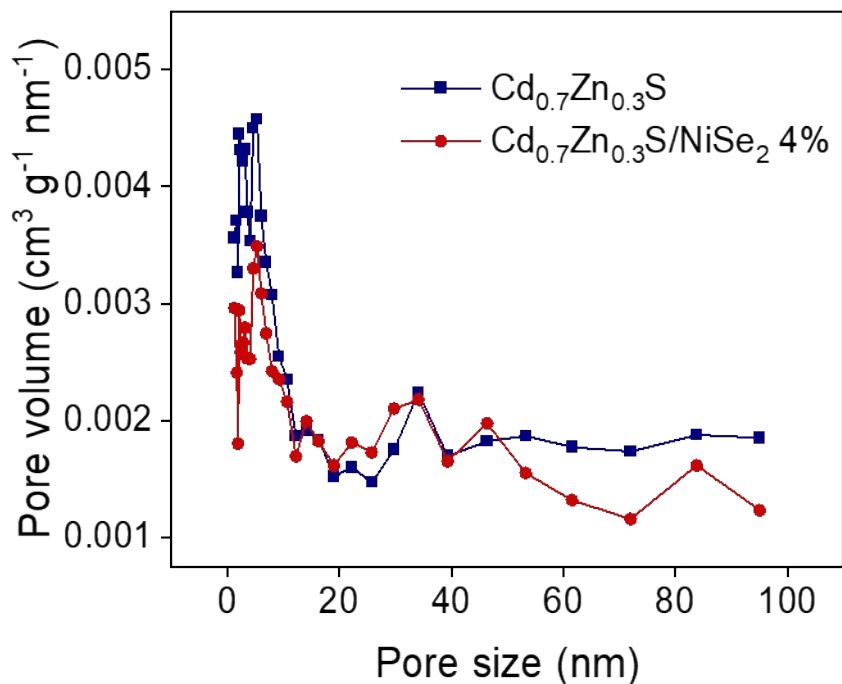

**Figure S27.** Pore size distribution of  $\text{Cd}_{0.7}\text{Zn}_{0.3}\text{S}$  and  $\text{Cd}_{0.7}\text{Zn}_{0.3}\text{S}/\text{NiSe}_2$  4%.

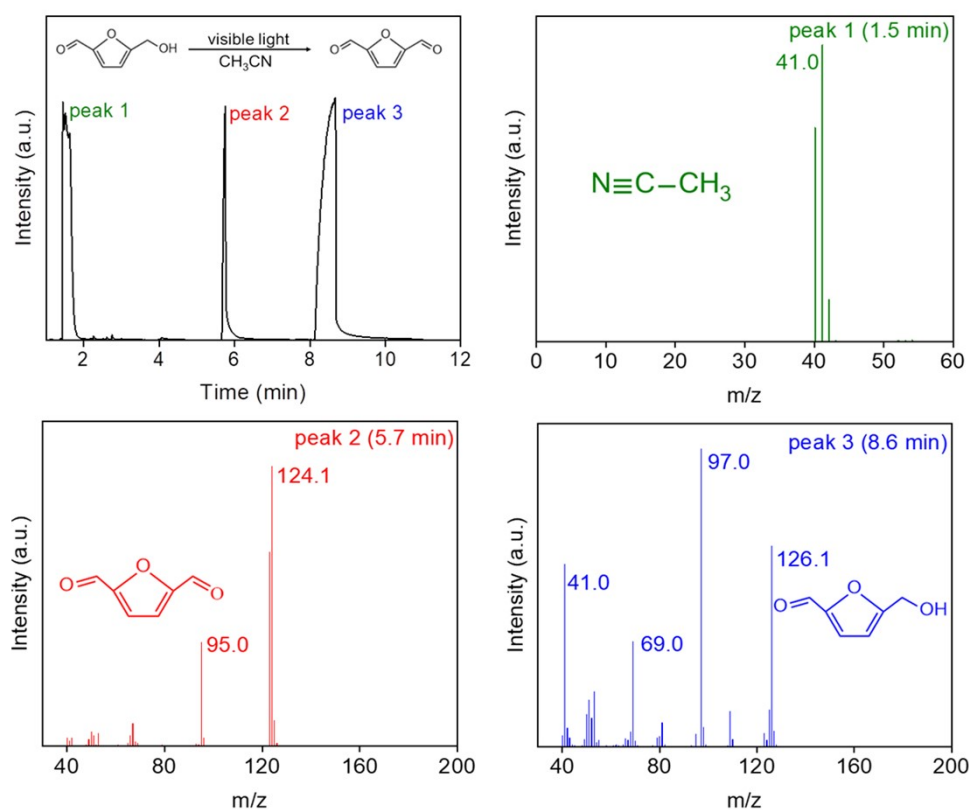

**Figure S28.** GC-MS spectra of the reaction solution analyzed after photocatalytic experiment. Conditions: 100  $\mu\text{mol}$  HMF, 10 mg  $\text{Cd}_{0.7}\text{Zn}_{0.3}\text{S}/\text{NiSe}_2$  4%, 3 mL  $\text{CH}_3\text{CN}$ ,  $780 \text{ nm} \geq \lambda \geq 400 \text{ nm}$ .

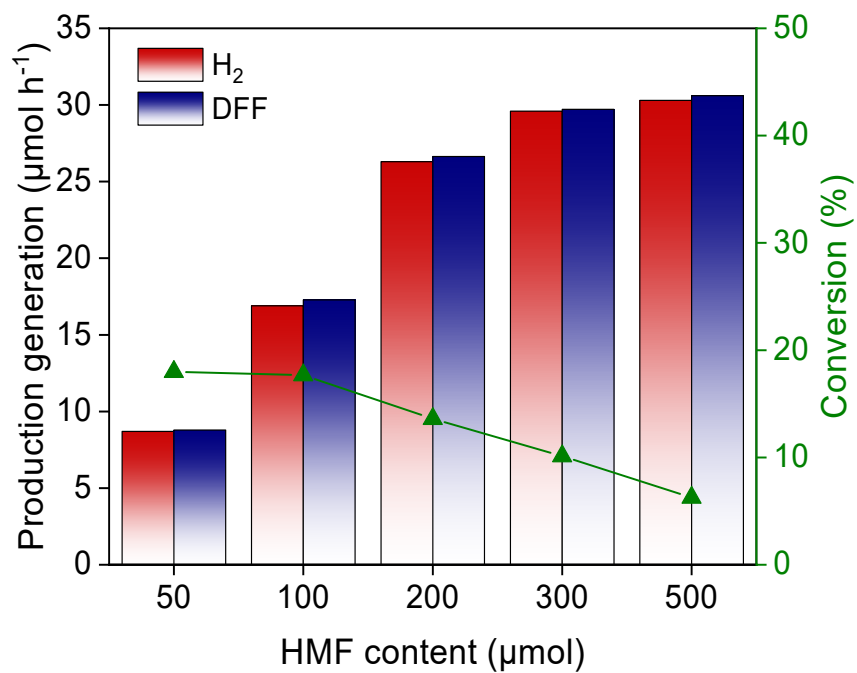

**Figure S29.** The photoactivity tests of selective HMF oxidation into DFF integrated with H<sub>2</sub> evolution under different concentrations.

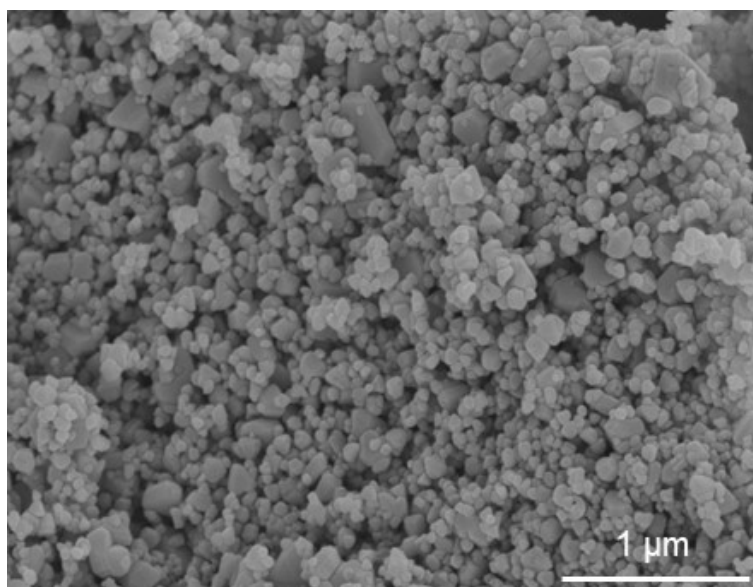

**Figure S30.** SEM image of Cd<sub>x</sub>Zn<sub>1-x</sub>S NPs



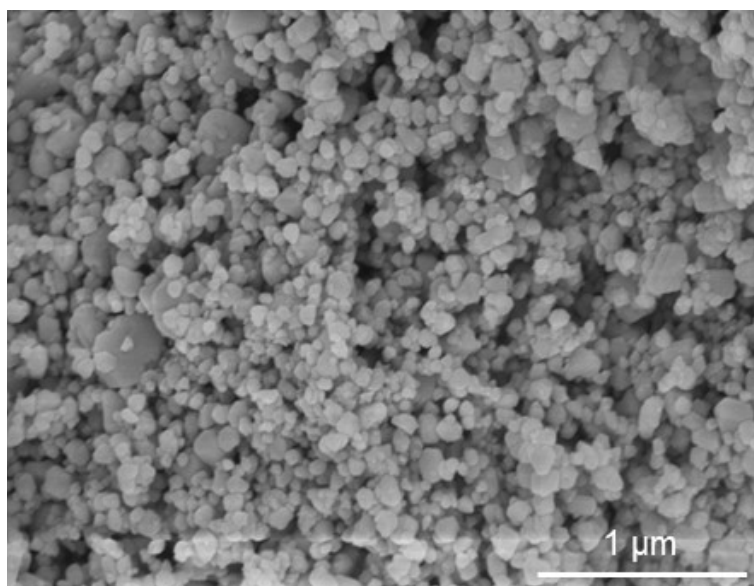

Figure S31. SEM image of  $Cd_xZn_{1-x}S$  NPs/ $NiSe_2$  4% composite.

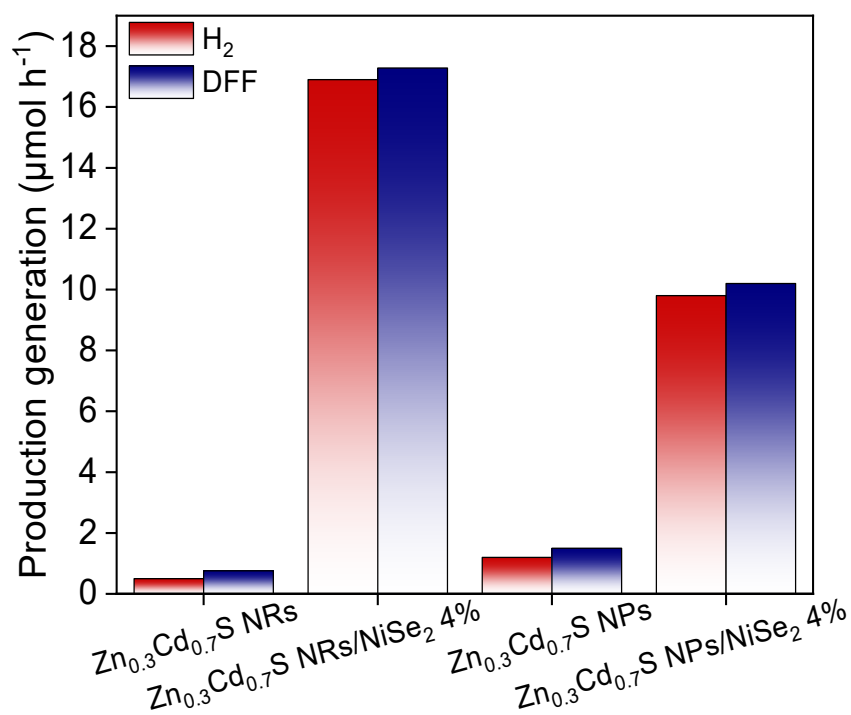

Figure S32. The photoactivity tests of selective HMF oxidation into DFF integrated with  $H_2$  evolution over different  $Cd_{0.7}Zn_{0.3}S$  and  $Cd_{0.7}Zn_{0.3}S/NiSe_2$  composites.

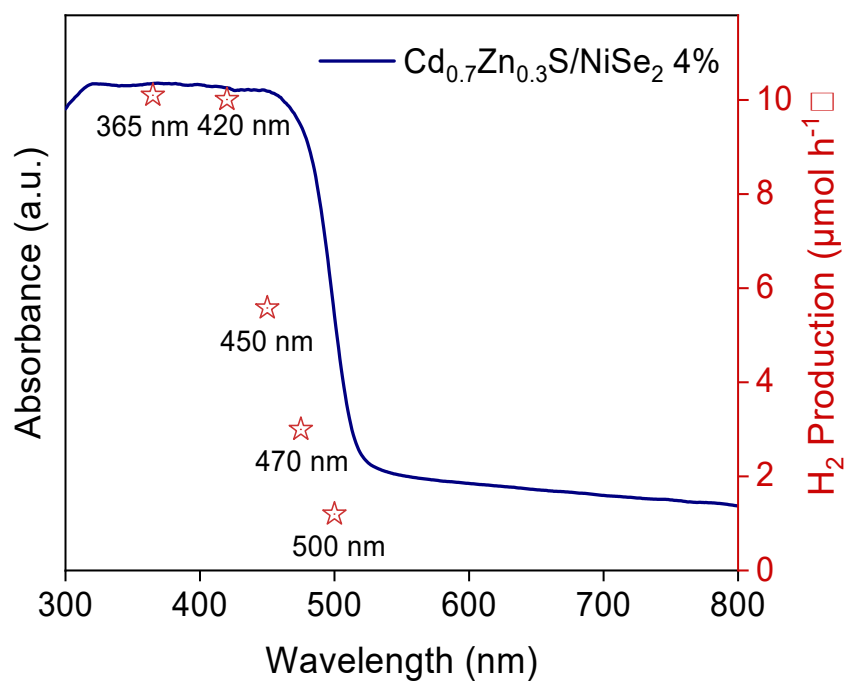

**Figure S33.** The photoactivity tests of selective HMF oxidation into DFF integrated with H<sub>2</sub> evolution under different wavelengths of light.

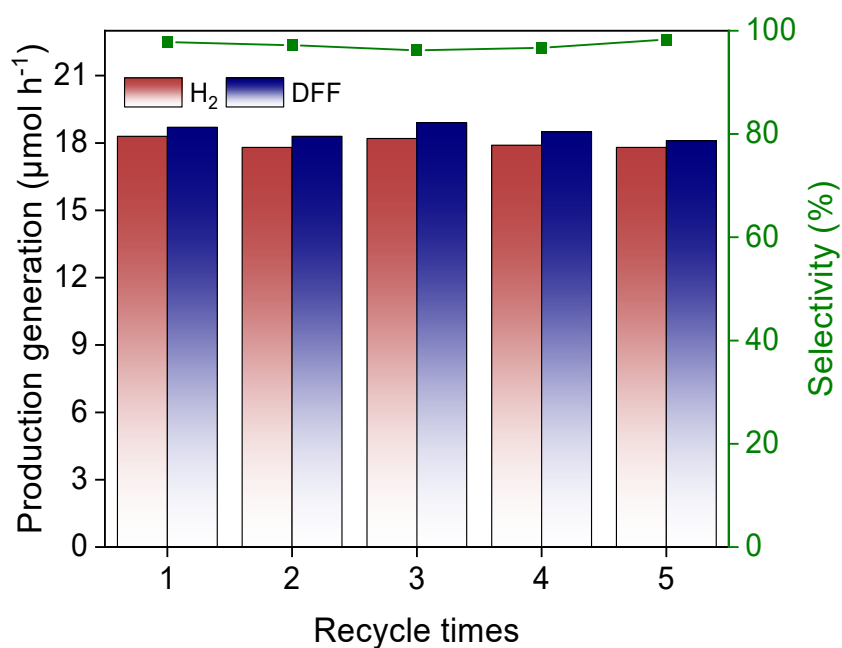

**Figure S34.** Photocatalytic cycle test of selective HMF oxidation into DFF integrated with H<sub>2</sub> over Zn<sub>0.7</sub>Cd<sub>0.3</sub>S/NiSe<sub>2</sub> 4%.

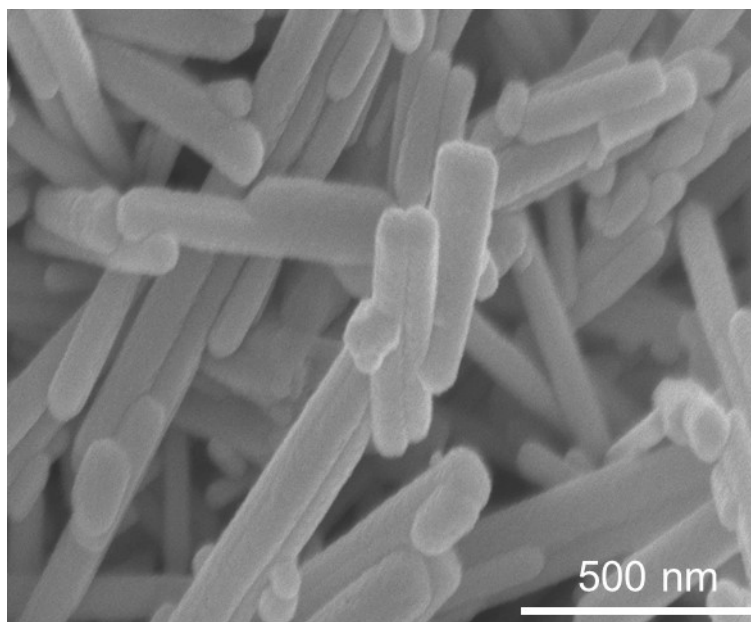

**Figure S35.** SEM image of  $\text{Cd}_{0.7}\text{Zn}_{0.3}\text{S}/\text{NiSe}_2$  4% after 11 h reaction.

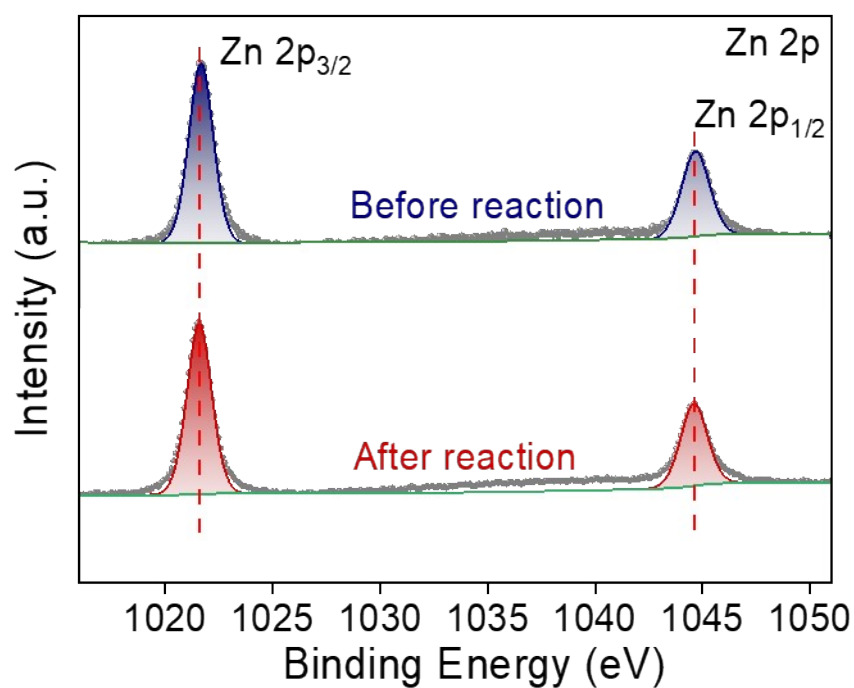

**Figure S36.** XPS spectra of Zn 2p of  $\text{Cd}_{0.7}\text{Zn}_{0.3}\text{S}/\text{NiSe}_2$  4% sample before reaction and after reaction.

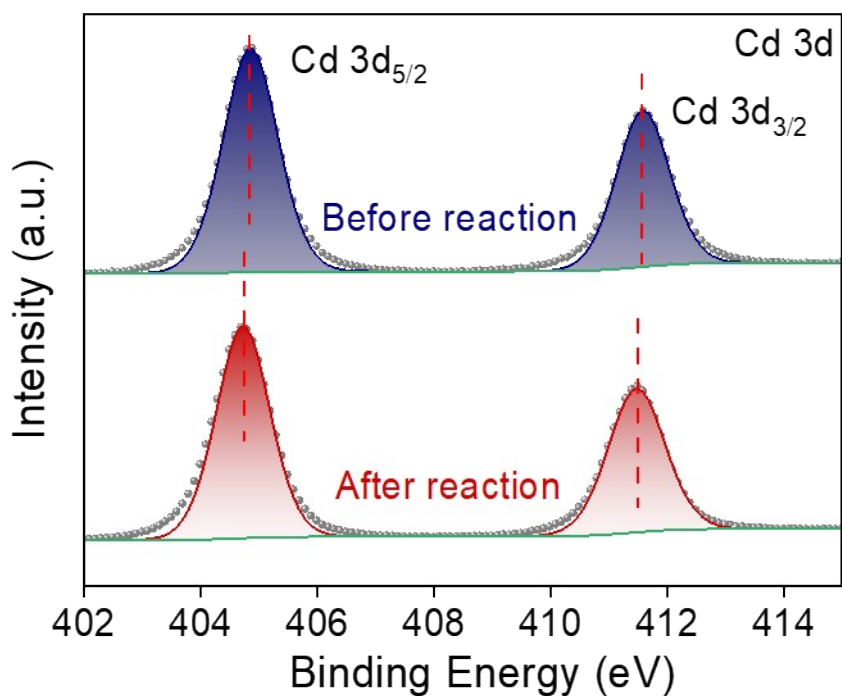

**Figure S37.** XPS spectra of Cd 3d of Cd<sub>0.7</sub>Zn<sub>0.3</sub>S/NiSe<sub>2</sub> 4% sample before reaction and after reaction.

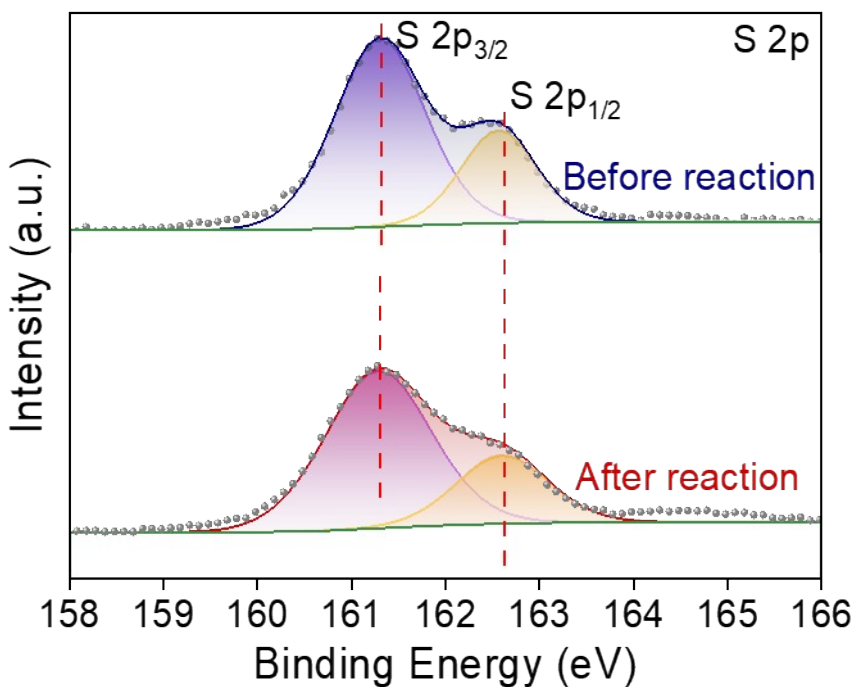

**Figure S38.** XPS spectra of S 2p of Cd<sub>0.7</sub>Zn<sub>0.3</sub>S/NiSe<sub>2</sub> 4% sample before reaction and after reaction.

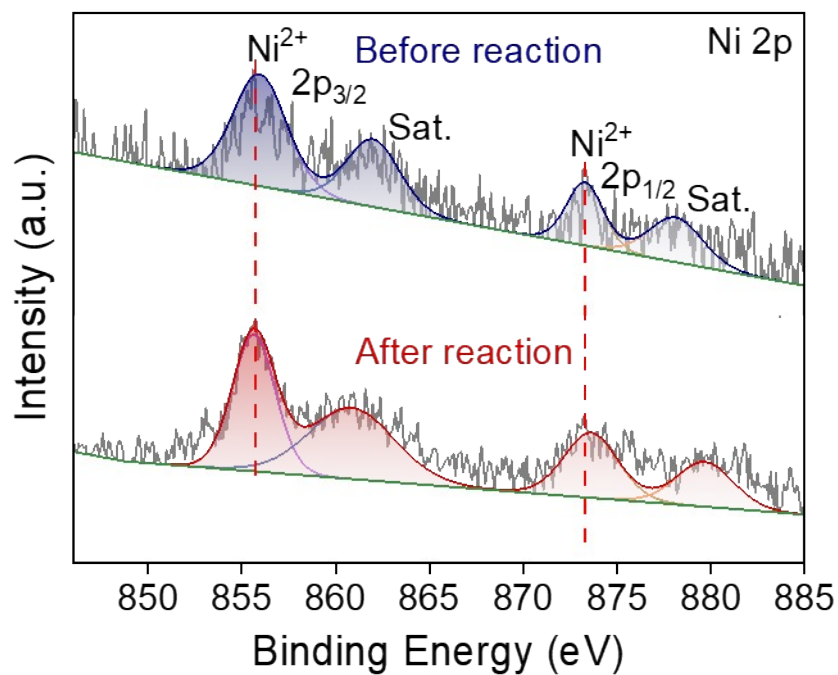

**Figure S39.** XPS spectra of Ni 2p of Cd<sub>0.7</sub>Zn<sub>0.3</sub>S/NiSe<sub>2</sub> 4% sample before reaction and after reaction.

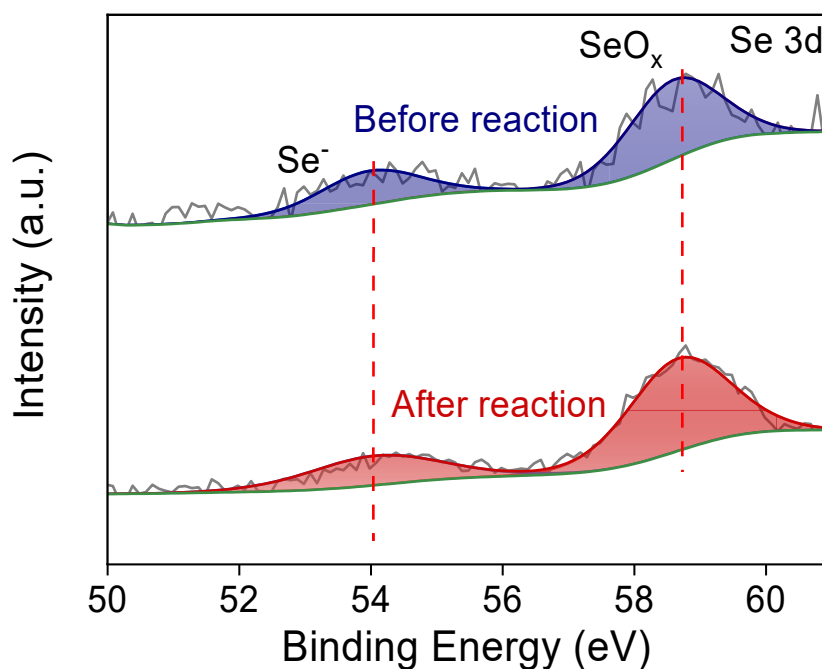

**Figure S40.** XPS spectra of Se 3d of Cd<sub>0.7</sub>Zn<sub>0.3</sub>S/NiSe<sub>2</sub> 4% sample before reaction and after the reaction.

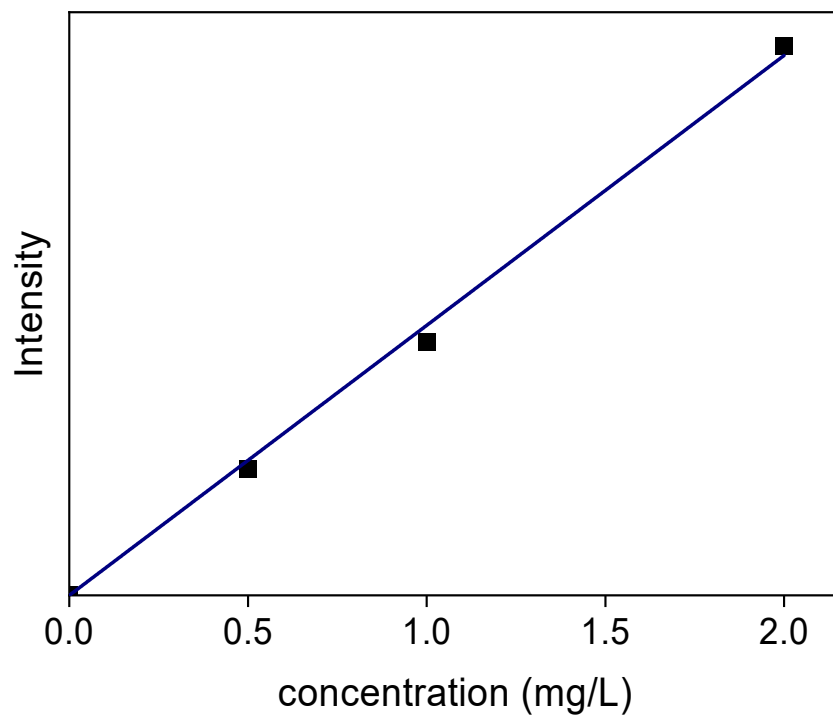

**Figure S41.** Standard curve of the ICP-OES for Cd<sup>2+</sup>.

**Table S1.** Photocatalytic performance of selective oxidation of HMF to DFF in relevant research.

| Entry | Catalyst                                                | Light source                               | H <sub>2</sub> production rate ( $\mu\text{mol g}^{-1} \text{h}^{-1}$ ) | DFF production rate ( $\mu\text{mol g}^{-1} \text{h}^{-1}$ ) | Atmosphere     | Reference |
|-------|---------------------------------------------------------|--------------------------------------------|-------------------------------------------------------------------------|--------------------------------------------------------------|----------------|-----------|
| 1     | Zn <sub>0.5</sub> Cd <sub>0.5</sub> S/MnO <sub>2</sub>  | $\lambda \geq 400$ nm, 30 $\times$ 3 W LED | 55                                                                      | 46                                                           | N <sub>2</sub> | [1]       |
| 2     | UCNT/Pt                                                 | $\lambda \geq 400$ nm, 300 W Xe lamp       | 92                                                                      | 95                                                           | vacuum         | [2]       |
| 3     | Zn <sub>0.5</sub> Cd <sub>0.5</sub> S-P                 | 30 $\times$ 3 W LED                        | 786                                                                     | 367                                                          | Ar             | [3]       |
| 4     | NiS/Zn <sub>3</sub> In <sub>2</sub> S <sub>6</sub>      | $\lambda \geq 420$ nm, 300 W Xe lamp       | 120                                                                     | 129                                                          | N <sub>2</sub> | [4]       |
| 5     | MAPbBr <sub>3</sub>                                     | $\lambda \geq 450$ nm, blue LED light      | -                                                                       | 106                                                          | Air            | [5]       |
| 6     | CN-WO <sub>3</sub>                                      | $\lambda \geq 420$ nm, 10 W LED            | -                                                                       | 36                                                           | Air            | [6]       |
| 7     | MoS <sub>2</sub> /CdIn <sub>2</sub> S <sub>4</sub>      | $\lambda \geq 420$ nm, 7 W LED             | -                                                                       | 50                                                           | Air            | [7]       |
| 8     | g-C <sub>3</sub> N <sub>4</sub> /Pd                     | 300 W Xe lamp                              | -                                                                       | 250                                                          | N <sub>2</sub> | [8]       |
| 9     | Au-Ru/rGO                                               | 300 W Xe lamp                              | -                                                                       | 1328                                                         | O <sub>2</sub> | [9]       |
| 10    | CoP/ZCS                                                 | $\lambda \geq 420$ nm, 300 W Xe lamp       | 600                                                                     | 400                                                          | vacuum         | [10]      |
| 11    | Cd <sub>0.7</sub> Zn <sub>0.3</sub> S/NiSe <sub>2</sub> | $\lambda \geq 400$ nm, 300 W Xe lamp       | 1690                                                                    | 1728                                                         | Ar             | This work |

**Table S2.** ICP-OES test of Cd<sub>0.7</sub>Zn<sub>0.3</sub>S/NiSe<sub>2</sub> x%.

| 10 mg Cd <sub>0.7</sub> Zn <sub>0.3</sub> S/NiSe <sub>2</sub> x% | 5%      | 8%      | 10%     | 11%     |
|------------------------------------------------------------------|---------|---------|---------|---------|
| Theoretical mass                                                 | 0.5 mg  | 0.8 mg  | 1 mg    | 1.1 mg  |
| Actual mass                                                      | 0.25 mg | 0.35 mg | 0.40 mg | 0.46 mg |

**Table S3.** Structural parameters of photocatalysts obtained from N<sub>2</sub> adsorption-desorption analysis.

| Catalyst                                                   | Specific surface area (m <sup>2</sup> /g) | Mean pore diameter (nm) | Pore volume (cm <sup>3</sup> /g) |
|------------------------------------------------------------|-------------------------------------------|-------------------------|----------------------------------|
| Cd <sub>0.7</sub> Zn <sub>0.3</sub> S                      | 22.4                                      | 34.7                    | 0.19                             |
| Cd <sub>0.7</sub> Zn <sub>0.3</sub> S/NiSe <sub>2</sub> 4% | 19.3                                      | 34.9                    | 0.17                             |



---

## References

1. S. Dhingra, T. Chhabra, V. Krishnan and C. M. Nagaraja, *ACS Appl. Energy Mater.*, 2020, **3**, 7138-7148.
2. X. Bao, M. Liu, Z. Wang, D. Dai, P. Wang, H. Cheng, Y. Liu, Z. Zheng, Y. Dai and B. Huang, *ACS Catal.*, 2022, **12**, 1919-1929.
3. H.-F. Ye, R. Shi, X. Yang, W.-F. Fu and Y. Chen, *Appl. Catal., B*, 2018, **233**, 70-79.
4. S. Meng, H. Wu, Y. Cui, X. Zheng, H. Wang, S. Chen, Y. Wang and X. Fu, *Appl. Catal., B*, 2020, **266**.
5. M. Zhang, Z. Li, X. Xin, J. Zhang, Y. Feng and H. Lv, *ACS Catal.*, 2020, **10**, 14793-14800.
6. H. Qian, Q. Hou, W. Zhang, Y. Nie, R. Lai, H. Ren, G. Yu, X. Bai, H. Wang and M. Ju, *Appl. Catal., B*, 2022, **319**.
7. Q. Zhu, Y. Zhuang, H. Zhao, P. Zhan, C. Ren, C. Su, W. Ren, J. Zhang, D. Cai and P. Qin, *Chin. J. Chem. Eng.*, 2022, DOI: 10.1016/j.cjche.2022.04.018.
8. A. E. ElMetwally, M. S. Sayed, Y. Zhou, J. B. Domena, J.-J. Shim, R. M. Leblanc, M. R. Knecht and L. G. Bachas, *J. Phys. Chem. Lett.*, 2022, **126**, 15671-15684.
9. B. Ma, Y. Wang, X. Guo, X. Tong, C. Liu, Y. Wang and X. Guo, *Appl. Catal., A*, 2018, **552**, 70-76.
10. Y. Yang, W. Ren, X. Zheng, S. Meng, C. Cai, X. Fu and S. Chen, *ACS Appl. Mater. Interfaces*, 2022, **14**, 54649-54661.
